27 **Abstract**

28 In the evolving landscape of electronic sports (esports), where economic and social expectations  
29 are soaring, a critical concern has emerged in physical complaints among esports players.

30 However, empirical insights into these complaints' prevalence and influencing factors are scarce.

31 This study aimed to clarify the prevalence of physical complaints and their association with esports

32 activities among Japanese esports players. A web-based cross-sectional survey encompassing 175

33 esports players from both professional and amateur teams in Japan was conducted. The analysis

34 focused on 79 male participants (average age:  $21.6 \pm 5.6$  years) with complete responses. The

35 survey items included the esports factors (the device mainly used, the duration of esports titles

36 played primarily, hours of esports activities per day on weekdays and holidays, and the distance

37 between the screen and the face during esports activities) and physical complaints (headache, neck

38 pain, stiff or sore shoulders, wrist pain, finger pain, lower back pain, and eye fatigue). A total of

39 49.4% reported stiff or sore shoulders, 48.1% faced eye fatigue, and 30.4% had headaches.

40 Professionals exhibited a significantly higher likelihood of neck, wrist, and lower back pain and

41 eye fatigue than amateurs. Age-adjusted logistic regression analysis uncovered that using mainly

42 mobile devices and being closer to the screen and face during esports activities were significantly

43 associated with neck pain, stiff or sore shoulders, lower back pain, and eye fatigue. These results

44 suggest that poor posture caused by using mobile devices and being closer to the screen during

45 esports activities was related to various physical complaints.

46

47 **Keywords:** electronic sports; video game; somatic symptom; musculoskeletal disease

## 48 **Introduction**

49 Electronic sports (esports) is “an organized and competitive approach to playing computer  
50 games”<sup>1</sup> through various platforms (such as consoles, computers, mobile devices, and virtual reality).  
51 The global esports audience and active esports players increase every year.<sup>2</sup> Esports was accepted as  
52 medal events in the 19th Asian Games held in 2023,<sup>3</sup> and the International Olympic Committee  
53 officially launched its Olympic Esports Series in 2023.<sup>4</sup> In Japan, esports events have been the  
54 programs of the National Sports Festival since 2019,<sup>5</sup> and expectations of esports’ economic benefits  
55 and social significance are growing.<sup>6</sup>

56 However, the growing interest in esports has resulted in some considerable downsides. Physical  
57 health is a major concern. Excessive video game playing is associated with physical complaints.<sup>7,8</sup> In  
58 addition, previous studies have investigated the prevalence of physical complaints among competitive  
59 esports players. DiFrancisco-Donoghue et al. reported that 56% of collegiate esports players in the  
60 United States and Canada suffered from eye fatigue, 42% had back or neck pain, 36% had wrist pain,  
61 and 32% had hand pain.<sup>9</sup> Lindberg et al. investigated musculoskeletal pain in esports players trained  
62 with a coach in Denmark. They reported that the primary pain sites included the back (31.3%), neck  
63 (11.3%), and shoulders (11.3%).<sup>10</sup> Another study conducted in China on professional mobile esports  
64 players reported that the neck (40%) was the most prevalent site of musculoskeletal complaints,  
65 followed by the fingers (38%), the head (32%), and the lower back (20%).<sup>11</sup> Furthermore, a study of  
66 competitive video gaming in Saudi Arabia showed that the most reported sites of injuries included the  
67 lower back (63.8%), neck (50%), hand/wrist (44.8%), and shoulder (35.3%).<sup>12</sup> The proportion of  
68 esports athletes with physical complaints in Japan is thought to be similar to that of these previous  
69 findings, but no empirical study has been conducted.

70 Furthermore, differences in the proportion of those with physical complaints by attributes such as  
71 age, body size, and esports level (professional or amateur) have not been examined among esports

72 players. In general, the proportion of people with physical complaints generally varies by attributes  
73 such as age and body size.<sup>13,14</sup> Furthermore, similar to traditional sports,<sup>15</sup> there may be differences in  
74 musculoskeletal conditions between professionals, who have their periodized training schedules, access  
75 to team resources, and season-based play, and amateurs.<sup>16</sup>

76 The issue of physical complaints in esports players is the same as in the context of occupational  
77 health; esports practice requires long periods of computer and console use while sitting in poor  
78 postures, repetitive or forceful movements, and prolonged screen exposure.<sup>17-22</sup> However, few  
79 empirical studies have examined the association between esports activities and physical complaints  
80 among esports players. A cross-sectional study reported that esports players with musculoskeletal pain  
81 participated in less esports training than those without pain.<sup>10</sup> A study in Saudi Arabia showed that the  
82 duration of playing video games and the days played per month were inversely associated with  
83 musculoskeletal disorders, with gamers who played for 1–5 years showing a higher rate of  
84 musculoskeletal disorders than those who played for more than 10 years.<sup>12</sup> Another study reported that  
85 career duration was not significantly associated with ease of eyestrain or leg numbness.<sup>11</sup> Considering  
86 the previous studies, the duration of esports play and the amount of time played per day may have little  
87 relationship with physical complaints. However, other factors of esports activities, such as the device  
88 used for esports and posture during play, have not been empirically examined in esports players, and  
89 these may be related to physical complaints in light of the points made above.

90 Therefore, this study aimed to clarify the prevalence of physical complaints and their association  
91 with esports activities among Japanese esports players.

92

## 93 **Methods**

### 94 *Procedure and participants*

95 In this study, representatives from one professional team and five amateur teams were asked to

96 survey all their team members. In total, 175 esports players were surveyed. An anonymous self-  
97 administered web-based questionnaire survey was conducted from April to May 2021. The URL of the  
98 questionnaire was provided to the representative on April 15 for the professional team and April 14 for  
99 the amateur teams. Next, the esports players responded to an anonymous self-administered web-based  
100 questionnaire by May 12 for the professional team and May 23 for the amateur teams. One hundred  
101 responses were collected (recovery rate: 57.1%). Of these, no women were on the professional team,  
102 and only 19 were on the amateur teams. Therefore, women were excluded from the analysis.  
103 Furthermore, two men were excluded from the analysis due to incomplete responses. Finally, 79 men  
104 with complete responses were included in the analysis.

105 This study was approved by the Ethics Committee of XXXX [name of the institution is hidden  
106 due to double blind review policy], in compliance with the Declaration of Helsinki (Reference No: Tai  
107 021-112). All respondents provided informed consent to participate in the study.

108

### 109 *Questionnaires*

110 The questionnaire included questions on attributes, esports activities, and physical complaints.  
111 The attributes included age, height, weight, and team affiliation. Body mass index (BMI) was  
112 calculated from height and weight; under 18.5 was considered “underweight,” 18.5 to under 25 as  
113 “normal weight,” and 25 or above as “overweight or obese.” Furthermore, the esports level was  
114 categorized as professional or amateur based on the teams to which they belonged.

115 Esports activities included the esports title played primarily, duration of esports titles played  
116 primarily, hours of esports activities per day on weekdays and holidays, and the distance between the  
117 screen and the face during esports activities. The device mainly used was categorized as “PC or  
118 console” and “mobile,” based on the response of the esports title played primarily.

119 Regarding physical complaints, the following seven items were established that had been

120 prevalent among esports players in previous studies:<sup>9-12</sup> headache, neck pain, stiff or sore shoulders,  
121 wrist pain, finger pain, lower back pain, and eye fatigue. Respondents were asked about the presence or  
122 absence of each item.

123

#### 124 *Statistical analysis*

125 The esports activities and the presence of each physical complaint were calculated and compared  
126 by age (divided by the median), BMI categories, and esports level (professional or amateur) using  
127 Fisher's exact tests, Mann–Whitney U tests, and Kruskal–Wallis tests. After confirming the correlation  
128 between each factor of esports activities using Spearman's rank correlation analysis, the association  
129 between esports activities and each physical complaint was investigated using logistic regression  
130 analysis. Two logistic regression analysis models were applied: Model 1 was adjusted for age, and  
131 Model 2 was adjusted for age and esports level (professional and amateur). The logistic regression  
132 analysis used physical complaints reported by 10% or more of the respondents. The distance between  
133 the screen and the face during esports activities was converted to 10 cm to avoid an extremely small  
134 range of odds ratios. SPSS Statistics 29 for Windows was used for all statistical analyses, and the  
135 statistical significance level was set at 5%.

136

#### 137 **Results**

138 Table 1 presents the characteristics of the respondents. The mean age was  $21.6 \pm 5.6$  years. Based  
139 on BMI, 27 respondents (34.2%) were underweight, 43 (54.4%) were normal weight, and 9 (11.4%)  
140 were overweight or obese. Of the respondents, 39 were professionals (49.4%), and 40 were amateurs  
141 (50.6%).

142 Regarding the device, 60 respondents (75.9%) mainly used PCs or consoles, and 19 (24.1%) used  
143 mobiles. The mean duration of esports titles played primarily was  $2.4 \pm 1.5$  years, and the mean number

144 of hours of esports activities per day was  $4.2 \pm 2.9$  hours on weekdays and  $4.1 \pm 3.3$  hours on holidays.

145 The mean distance between the screen and the face during esports activities was  $44.7 \pm 26.7$  cm.

146 Among physical complaints, stiff or sore shoulders were the most common complaints, with 39  
147 respondents (49.4%), followed by eye fatigue with 38 respondents (48.1%), headache with 24  
148 respondents (30.4%), and neck pain and lower back pain with 23 respondents (29.1%) each.

149 Table 2 shows the esports activities, and the proportion of each physical complaint was assessed  
150 according to age, BMI categories, and esports level (professional or amateur). Professionals were more  
151 likely than amateurs to use mainly mobile devices ( $p < 0.001$ ). Furthermore, professionals spent  
152 significantly more time on esports activities on weekdays ( $p < 0.001$ ) and had a significantly shorter  
153 distance between the screen and face during esports activities than amateurs ( $p < 0.001$ ). Regarding  
154 physical complaints, professionals were significantly more likely to experience neck pain ( $p < 0.05$ ),  
155 wrist pain ( $p < 0.05$ ), lower back pain ( $p < 0.05$ ), and eye fatigue ( $p < 0.01$ ) than amateurs. There was  
156 no difference in esports activities or physical complaints according to age or BMI.

157 Table 3 presents the correlations between each factor of esports activities. The device mainly  
158 used had a significant correlation with the hours of esports activities per day on weekdays ( $\rho = 0.266$ ,  $p$   
159  $< 0.05$ ) and the distance between the screen and face during esports activities ( $\rho = -0.598$ ,  $p < 0.001$ ).  
160 Hours of esports activities per day on weekdays also had a significant correlation with hours of esports  
161 activities per day on holidays ( $\rho = 0.524$ ,  $p < 0.001$ ) and the distance between the screen and the face  
162 during esports activities ( $\rho = -0.499$ ,  $p < 0.001$ ).

163 Table 4 shows the relationships between esports activities and each physical complaint reported  
164 by 10% or more of the respondents. In Model 1 adjusted for age, the device mainly used was  
165 significantly related to neck pain (OR: 5.62, 95% CI: 1.72-18.33,  $p < 0.01$ ), stiff or sore shoulders (OR:  
166 7.63, 95% CI: 2.16-27.03,  $p < 0.01$ ), low back pain (OR: 4.71, 95% CI: 1.52-14.61,  $p < 0.01$ ), and eye  
167 fatigue (OR: 4.45, 95% CI: 1.37-14.41,  $p < 0.05$ ). The distance between the screen and the face during

168 esports activities also had a significant association with neck pain (OR: 0.61, 95% CI: 0.44–0.85,  $p <$   
169 0.01), stiff or sore shoulders (OR: 0.69, 95% CI: 0.54–0.87,  $p <$  0.01), low back pain (OR: 0.75, 95%  
170 CI: 0.59–0.96,  $p <$  0.05), and eye fatigue (OR: 0.71, 95% CI: 0.56–0.89,  $p <$  0.01).

171 In Model 2 adjusted for age and esports level, the device mainly used was still significantly  
172 associated with stiff or sore shoulders (OR: 7.42, 95% CI: 1.73–31.78,  $p <$  0.01). Furthermore, the  
173 distance between the screen and the face during esports activities had a significant association with  
174 neck pain (OR: 0.63, 95% CI: 0.43–0.94,  $p <$  0.05) and stiff or sore shoulders (OR: 0.65, 95% CI:  
175 0.48–0.88,  $p <$  0.01).

176

## 177 **Discussion**

178 This study aimed to clarify the prevalence of physical complaints and their association with  
179 esports activities among Japanese esports players. The results showed that stiff or sore shoulders were  
180 the most common, followed by eye fatigue, headache, neck pain, and lower back pain. These  
181 proportions were similar to previous studies.<sup>9,11</sup> In contrast, wrist and finger pain was reported as  
182 considerably less frequent. Previous studies have shown a wide range of results. In a study in Denmark,  
183 6.25% of respondents had wrist pain, and 5% had hand pain when training with an esports coach,<sup>10</sup>  
184 similar to our findings. However, in another study in China, wrist pain was only reported in 8% of the  
185 study participants, whereas hand pain was reported in 38% of respondents who were professional  
186 mobile esports players.<sup>11</sup> DiFrancisco-Donoghue et al. reported that 36% and 32% of collegiate esports  
187 players in the United States and Canada, respectively, experienced wrist and hand pain [9]. Fathuldeen  
188 et al. showed that 44.8% of competitive video gaming players in Saudi Arabia reported hand/wrist  
189 injuries.<sup>12</sup> Unlike other body parts, the wrists and fingers require repetitive movements during esports  
190 activities. These repetitive movements may underpin wrist and finger pain. However, our study and



191 these previous studies did not investigate repetitive movements of the wrist and finger, and thus, future  
192 studies should consider them.

193 The proportion of those with neck, wrist, and lower back pain and eye fatigue was significantly  
194 higher among professionals than amateurs. In traditional sports, professionals with periodized training  
195 schedules and access to team resources are less prone to musculoskeletal problems than amateurs.<sup>15</sup>  
196 Our opposite result in esports players suggests an inadequate support system for professionals.  
197 Furthermore, regarding esports activities, professionals spent more time practicing on weekdays, were  
198 more likely to mainly use mobile devices, and were closer to the screen than amateurs. These three  
199 factors of esports activities were correlated with each other. Among them, the main device used and the  
200 distance between the screen and the face during esports activities were significantly associated with  
201 some physical complaints in the logistic regression analysis. Thus, these factors may have affected the  
202 high proportion of those with physical complaints among professionals.

203 Mainly using mobile devices and being closer to the screen and face during esports activities  
204 were associated with a higher proportion of those with neck pain, stiff or sore shoulders, lower back  
205 pain, and eye fatigue in the age-adjusted logistic regression analysis (Model 1). Although the  
206 importance of these studies has been noted, the proportion of those with physical complaints regarding  
207 the different devices used to play esports has not been examined.<sup>20</sup> Some systematic reviews suggested  
208 associations between the regular use of mobile devices and physical complaints in the eyes, neck, and  
209 upper extremities.<sup>23-25</sup> Furthermore, these two would be linked problems because there was a relatively  
210 high correlation between mainly using mobile devices and being closer to the screen during esports  
211 activities.

212 One of the reasons that these two esports activities factors were associated with physical  
213 complaints could be due to the player's posture when playing esports. Mobile esports players are more  
214 likely to adopt a forward or flexed head posture for better eye focus, while the elbows press on the table

215 to hold the arm and the mobile device. They may also have a slouched posture and rounded shoulders.  
216 Such poor posture can impose problems on the musculoskeletal and ocular systems.<sup>26,27</sup>

217 Based on our results, ergonomic approaches can effectively prevent physical complaints. Height-  
218 adjustable desks or desk-mounted armrests can help position the arm or mobile device higher or closer  
219 to the upper extremities. Increasing the strength and flexibility of the trunk muscles may also help  
220 address physical complaints. A previous study evaluated spinal function using an external noninvasive  
221 device and reported that professional mobile esports players demonstrated significantly poorer spine  
222 posture, mobility, and stability than the standard reference.<sup>28</sup> Moreover, offering opportunities to stand  
223 during esports activities may efficiently alleviate physical complaints. While standing up in the middle  
224 of a set of games is difficult, providing opportunities to stand between sets is possible. Periodic  
225 interruption of sedentary behavior improves musculoskeletal symptoms.<sup>29</sup> Taking a break while using  
226 electronic equipment also reduces computer vision syndromes, including eye fatigue.<sup>30</sup>

227 In a logistic regression analysis adjusted for age and esports level (Model 2), significant  
228 associations were only seen between the device mainly used and stiff or sore shoulders and between the  
229 distance between the screen and the face during esports activities and neck pain and stiff or sore  
230 shoulders. However, other odds ratios that showed significant associations in Model 1 remained high in  
231 Model 2. Thus, these associations may be strong. However, further studies are needed to target more  
232 esports players due to the small number of respondents in this study.

233 The duration of esports titles played primarily and hours of esports activities per day on  
234 weekdays and holidays had no significant association with physical complaints. A previous study  
235 reported that career duration was not significantly associated with ease of eyestrain or leg numbness,<sup>11</sup>  
236 consistent with the findings of this study. However, another study in Saudi Arabia showed that the  
237 duration of playing video games was inversely related to musculoskeletal disorders, with gamers who  
238 played for 1–5 years showing a higher rate of having musculoskeletal disorders than those who played

239 for more than 10 years.<sup>12</sup> Also, Lindberg et al. reported that esports players with musculoskeletal pain  
240 participated in less esports training than those without pain.<sup>10</sup> Indeed, excessive esports playing may  
241 negatively impact physical health. However, considering our study and previous studies, the findings of  
242 the cross-sectional studies cannot rule out the possibility that many esports players who are excessively  
243 playing are retired. Therefore, a longitudinal study is necessary to verify the causal relationships among  
244 these variables.

245 This study had some limitations. First, as noted above, since the number of respondents in this  
246 study was small, further studies are needed to target more esports players. Second, this study used  
247 cross-sectional data; therefore, we could not evaluate the causal relationship between esports activities  
248 and physical complaints. A longitudinal study is necessary to verify the causal relationships among  
249 these variables. Third, other factors related to esports activities should also be considered. For example,  
250 equipment characteristics and repetitive movements of the wrists and fingers may be related to physical  
251 complaints. Fourth, our study only included male players. Currently, there are a few female esports  
252 players.<sup>31</sup> However, the number of women may increase in the future because physical attributes are  
253 unrelated to high performance in esports, allowing men and women to compete in the same events,  
254 unlike traditional sports.<sup>32</sup> Therefore, it is necessary to accumulate knowledge about female esports  
255 players. Finally, data were collected using self-reported questionnaires. Therefore, reporter bias cannot  
256 be ruled out.

257 Despite these limitations, to the best of our knowledge, this is the first study to examine factors of  
258 esports activities from multiple perspectives related to physical complaints among esports players.  
259 Since esports players require long hours of esports activities to enhance their competitive performance,  
260 it is notable that we were able to identify clues to practical countermeasures for their physical  
261 complaints from factors other than the duration of esports activities.

262

263 **Conclusions**

264 Esports players in Japan reported that stiff or sore shoulders were the most common complaint,  
265 followed by eye fatigue, headache, neck pain, and lower back pain. Mainly using mobile devices and  
266 being closer to the screen and face during esports activities were associated with a higher proportion of  
267 those with neck pain, stiff or sore shoulders, low back pain, and eye fatigue.

268

269

270 **Data availability statement**

271 The data supporting the findings of this study are available from the corresponding authors upon  
272 reasonable request.

273

274 **Acknowledgments**

275 The authors would like to express their sincere gratitude to all the participants for their invaluable  
276 contributions to this study. Additionally, we would like to extend our heartfelt appreciation to the  
277 Ibaraki Esports Industry Creation Project, facilitated by Ibaraki Prefecture, Japan, for their  
278 indispensable support in fostering connections with esports teams. We are especially grateful to Mr.  
279 Okada, Mr. Kawamoto H. Ayato, and Mrs. Sawada, as well as the representatives from each esports  
280 team, for their invaluable assistance in participant recruitment, which played a vital role in the  
281 successful completion of our research.

282

283 **Authors contribution statement**

284 Takafumi Monma conceptualized the study design, acquired, analyzed, and interpreted the data,  
285 and wrote the manuscript. Takashi Matsui conceptualized the study design, acquired, analyzed, and  
286 interpreted the data, and reviewed the manuscript. Shoya Koyama, Hiromasa Ueno, Junichi Kagesawa,

287 Chisato Oba, Kentaro Nakamura, Hideki Takagi, and Fumi Takeda reviewed the manuscript. All the  
288 authors have approved the final manuscript.

289

### 290 **Author Disclosure Statement**

291 Takafumi Monma and Takashi Matsui report grants from REJECT Inc., NTT EAST Corp., and  
292 Meiji Co., Ltd. Shoya Koyama is the chief executive officer and Hiromasa Ueno is an employee of  
293 REJECT, Inc. Junichi Kagesawa declares that he is an executive vice president of the NTTe-Sports Ltd.  
294 Chisato Oba and Kentaro Nakamura declare that they are employed by Meiji Co. Ltd. All other authors  
295 declare no competing interests.

296

### 297 **Funding Information**

298 This study was partially supported by joint research grants from REJECT Inc., NTT EAST Corp.,  
299 and Meiji Co., Ltd. These companies provided support to the authors affiliated with each company  
300 through officers' compensation and/or salaries. However, these companies did not have any additional  
301 roles in the decision to publish or prepare this manuscript.

302

### 303 **References**

- 304 1. Witkowski E. On the digital playing field: how we “Do Sport” with networked computer games.  
305 Games Cult 2012;7:349-374; doi: 10.1177/1555412012454222.
- 306 2. Newzoo. Newzoo global games market report 2022 (Free Version). 2022. Available from:  
307 <https://newzoo.com/resources/trend-reports/newzoo-global-games-market-report-2022-free-version>.  
308 [Last accessed Nov. 9, 2023].
- 309 3. The 19th Asian Games Hangzhou 2022 Organising Committee. Esports. The 19th Asian Games  
310 Hangzhou 2022. 2022. Available from:

- 311 [https://www.hangzhou2022.cn/En/competitions/sports/competitive/202204/t20220410\\_47302.shtml](https://www.hangzhou2022.cn/En/competitions/sports/competitive/202204/t20220410_47302.shtml)  
312 . [Last accessed Nov. 9, 2023].
- 313 4. International Olympic Committee. Olympic Esports Series. Available from:  
314 <https://olympics.com/en/esports/#get-in-the-game>. [Last accessed Nov. 9, 2023].
- 315 5. Jiji Press News. Esports Event Starts as Part of Japan National Sports Fest. 2019. Available from:  
316 <https://sp.m.jiji.com/english/show/555>. [Last accessed Nov. 9, 2023].
- 317 6. The Japan esports union. For the Esports Development in Japan -From the perspective of further  
318 market growth and social significance. 2020. Available from: [https://jesu.or.jp/wp-](https://jesu.or.jp/wp-content/themes/jesu/contents/pdf/en_discussion_02.pdf)  
319 [content/themes/jesu/contents/pdf/en\\_discussion\\_02.pdf](https://jesu.or.jp/wp-content/themes/jesu/contents/pdf/en_discussion_02.pdf). [Last accessed Nov. 9, 2023].
- 320 7. Palanichamy T, Sharma MK, Sahu M, et al. Influence of esports on stress: a systematic review. *Ind*  
321 *Psychiatry J* 2020;29(2):191-199; doi: 10.4103/ipj.ipj\_195\_20.
- 322 8. Tholl C, Bickmann P, Wechsler K, et al. Musculoskeletal disorders in video gamers - a systematic  
323 review. *BMC Musculoskelet Disord* 2022;23(1):678; doi: 10.1186/s12891-022-05614-0.
- 324 9. DiFrancisco-Donoghue J, Balentine J, Schmidt G, et al. Managing the health of the eSport athlete:  
325 an integrated health management model. *BMJ Open Sport Exerc Med*. 2019;5(1):e000467; doi:  
326 10.1136/bmjsem-2018-000467.
- 327 10. Lindberg L, Nielsen SB, Damgaard M, Sloth OR, Rathleff MS, Straszek CL. Musculoskeletal pain  
328 is common in competitive gaming: a cross-sectional study among Danish esports athletes. *BMJ*  
329 *Open Sport Exerc Med* 2020;6(1):000799; doi: 10.1136/bmjsem-2020-000799.
- 330 11. Lam WK, Liu RT, Chen B, et al. Health risks and musculoskeletal problems of elite mobile esports  
331 players: a cross-sectional descriptive study. *Sports Med Open* 2022;8(1):65;  
332 <https://doi.org/10.1186/s40798-022-00458-3>.
- 333 12. Fathuldeen A, Alshammiri MF, Abdulmohsen A. Prevalence and awareness of musculoskeletal  
334 injuries associated with competitive video gaming in Saudi Arabia. *Cureus*. 2023;15(4):e37733;

- 335       doi: 10.7759/cureus.37733.
- 336   13. Fayaz A, Croft P, Langford RM, et al. Prevalence of chronic pain in the UK: a systematic review  
337       and meta-analysis of population studies. *BMJ Open* 2016;6(6):e010364; doi: 10.1136/bmjopen-  
338       2015-010364.
- 339   14. Kortt M, Baldry J. The association between musculoskeletal disorders and obesity. *Aust Health Rev*  
340       2002;25(6):207-214; doi: 10.1071/ah020207.
- 341   15. Hägglund M, Waldén M, Ekstrand J. Injury recurrence is lower at the highest professional football  
342       level than at national and amateur levels: does sports medicine and sports physiotherapy deliver? *Br*  
343       *J Sports Med* 2016;50(12):751-758; doi: 10.1136/bjsports-2015-095951.
- 344   16. McGee C, Hwu M, Nicholson LL, et al. More than a Game: musculoskeletal injuries and a key role  
345       for the physical therapist in esports. *J Orthop Sports Phys Ther* 2021;51(9):415-417; doi:  
346       10.2519/jospt.2021.0109.
- 347   17. Pereira AM, Brito J, Figueiredo P, et al. Virtual sports deserve real sports medical attention. *BMJ*  
348       *Open Sport Exerc Med* 2019;5(1):e000606; doi: 10.1136/bmjsem-2019-000606.
- 349   18. Rossoni A, Vecchiato M, Brugin E, et al. The eSports medicine: pre-participation screening and  
350       injuries management-an update. *Sports*. 2023;11(2):34; doi: 10.3390/sports11020034.
- 351   19. Emara AK, Ng MK, Cruickshank JA, et al. Gamer's health guide: optimizing performance,  
352       recognizing hazards, and promoting wellness in esports. *Curr Sports Med Rep* 2020;19(12):537-  
353       545; doi: 10.1249/JSR.0000000000000787.
- 354   20. McGee C, Ho K. Tendinopathies in video gaming and esports. *Front Sports Act Living*  
355       2021;3:689371; doi: 10.3389/fspor.2021.689371.
- 356   21. Truong P, Truong L, Le T, et al. Orthopedic injuries from video games: a literature review and  
357       implications for the future. *Int Arch Orthop Surg* 2020;3:020; doi: 10.23937/2643-4016/1710020.
- 358   22. Lewis J, Trinh P, Kirsh D. A corpus analysis of strategy video game play in starcraft: brood war.

- 359 Proceedings of the Annual Meeting of the Cognitive Science Society 2011;33:687-692.
- 360 23. Xie Y, Szeto G, Dai J. Prevalence and risk factors associated with musculoskeletal complaints  
361 among users of mobile handheld devices: a systematic review. *Appl Ergon* 2017;59(Pt A):132-142;  
362 doi: 10.1016/j.apergo.2016.08.020.
- 363 24. Toh SH, Coenen P, Howie EK, et al. The associations of mobile touch screen device use with  
364 musculoskeletal symptoms and exposures: a systematic review. *PLOS ONE* 2017;12(8):e0181220;  
365 doi: 10.1371/journal.pone.0181220.
- 366 25. Wang J, Li M, Zhu D, et al. Smartphone overuse and visual impairment in children and young  
367 adults: systematic review and meta-analysis. *J Med Internet Res* 2020;22(12):e21923;  
368 <https://doi.org/10.2196/21923>.
- 369 26. Kim SY, Koo SJ. Effect of duration of smartphone use on muscle fatigue and pain caused by  
370 forward head posture in adults. *J Phys Ther Sci* 2016;28(6):1669-1672;  
371 <https://doi.org/10.1589/jpts.28.1669>.
- 372 27. Kim J, Hwang Y, Kang S, et al. Association between exposure to smartphones and ocular health in  
373 adolescents. *Ophthalmic Epidemiol* 2016;23(4):269-276; doi: 10.3109/09286586.2015.1136652.
- 374 28. Lam WK, Chen B, Liu RT, et al. Spine posture, mobility, and stability of top mobile esports  
375 athletes: a case series. *Biology* 2022;11(5):737. doi: 10.3390/biology11050737.
- 376 29. Thorp AA, Kingwell BA, Owen N, et al. Breaking up workplace sitting time with intermittent  
377 standing bouts improves fatigue and musculoskeletal discomfort in overweight/obese office  
378 workers. *Occup Environ Med* 2014;71(11):765-771; doi: 10.1136/oemed-2014-102348.
- 379 30. Coronel-Ocampos J, Gómez J, Gómez A, et al. Computer visual syndrome in medical students from  
380 a private university in Paraguay: a survey study. *Front Public Health* 2022;10:935405; doi:  
381 10.3389/fpubh.2022.935405.
- 382 31. The sports integrity initiative. *Gaming & gender: how inclusive are eSports?*; 2019. Available from:



- 383 <https://www.sportsintegrityinitiative.com/gaming-gender-how-inclusive-are-esports/>. [Last accessed  
384 Nov. 9, 2023].
- 385 32. Shen C, Ratan R, Cai YD, et al. Do men advance faster than women? Debunking the gender  
386 performance gap in two massively multiplayer online games. *J Comput Mediat Comm*  
387 2016;21(4):312-329; doi: 10.1111/jcc4.12159.

388 TABLE 1. RESPONDENT CHARACTERISTICS

|                                                                         |                             | Mean $\pm$ SD<br>or n (%) |
|-------------------------------------------------------------------------|-----------------------------|---------------------------|
| Attributes                                                              |                             |                           |
| Age                                                                     |                             | 21.6 $\pm$ 5.6            |
| Body mass index                                                         | Underweight                 | 27(34.2)                  |
|                                                                         | Normal weight               | 43(54.4)                  |
|                                                                         | Overweight or obese         | 9(11.4)                   |
| Esports level                                                           | Professional                | 39(49.4)                  |
|                                                                         | Amateur                     | 40(50.6)                  |
| Esports activities                                                      |                             |                           |
| Esports title played primarily                                          | VALORANT                    | 5(6.3)                    |
|                                                                         | Rainbow Six Siege           | 7(8.9)                    |
|                                                                         | PUBG                        | 5(6.3)                    |
|                                                                         | APEX Legends                | 8(10.1)                   |
|                                                                         | Call of Duty                | 3(3.8)                    |
|                                                                         | Call of Duty mobile         | 5(6.3)                    |
|                                                                         | PUBG mobile                 | 7(8.9)                    |
|                                                                         | PUBG mobile (Academy)       | 3(3.8)                    |
|                                                                         | League of Legends Wild Rift | 4(5.1)                    |
|                                                                         | Fortnite                    | 32(40.5)                  |
| Duration of esports titles played primarily (years)                     |                             | 2.4 $\pm$ 1.5             |
| Hours of esports activities per day                                     | Weekdays                    | 4.2 $\pm$ 2.9             |
|                                                                         | Holidays                    | 4.1 $\pm$ 3.3             |
| Distance between the screen and the face during esports activities (cm) |                             | 44.7 $\pm$ 26.7           |
| Physical complaints (Presence)                                          |                             |                           |
|                                                                         | Headache                    | 24(30.4)                  |
|                                                                         | Neck pain                   | 23(29.1)                  |
|                                                                         | Stiff or sore shoulders     | 39(49.4)                  |
|                                                                         | Wrist pain                  | 5(6.3)                    |
|                                                                         | Finger pain                 | 3(3.8)                    |
|                                                                         | Lower back pain             | 23(29.1)                  |
|                                                                         | Eye fatigue                 | 38(48.1)                  |

389

390 TABLE 2. ESPORTS ACTIVITIES AND PHYSICAL COMPLAINTS BY ATTRIBUTES

|                                                                         |               | Age               |                   | Body mass index    |                   |                   | Esports level       |                    |                   |                   |                     |
|-------------------------------------------------------------------------|---------------|-------------------|-------------------|--------------------|-------------------|-------------------|---------------------|--------------------|-------------------|-------------------|---------------------|
|                                                                         |               | <20 years         | ≥20 years         |                    | Underweight       | Normal weight     | Overweight or obese |                    | Professional      | Amateur           |                     |
|                                                                         |               | n (%) or Mean ±SD | n (%) or Mean ±SD | P                  | n (%) or Mean ±SD | n (%) or Mean ±SD | n (%) or Mean ±SD   | P                  | n (%) or Mean ±SD | n (%) or Mean ±SD | P                   |
| Esports activities                                                      |               |                   |                   |                    |                   |                   |                     |                    |                   |                   |                     |
| Device of the esports title mainly played                               | PC or console | 26(70.3)          | 34(81.0)          | 0.301 <sup>a</sup> | 18(66.7)          | 34(79.1)          | 8(88.9)             | 0.381 <sup>a</sup> | 20(51.3)          | 40(100.0)         | <0.001 <sup>a</sup> |
|                                                                         | Mobile        | 11(29.7)          | 8(19.0)           |                    | 9(33.3)           | 9(20.9)           | 1(11.1)             |                    | 19(48.7)          | 0(0.0)            |                     |
| Duration of esports titles played primarily (years)                     |               | 2.2±1.1           | 2.6±1.8           | 0.425 <sup>b</sup> | 2.5±1.9           | 2.5±1.2           | 2.1±1.9             | 0.447 <sup>c</sup> | 2.5±1.9           | 2.3±1.1           | 0.906 <sup>b</sup>  |
| Hours of esports activities per day                                     | Weekdays      | 3.7±2.5           | 4.7±3.2           | 0.162 <sup>b</sup> | 4.4±2.1           | 4.1±3.4           | 4.2±3.0             | 0.693 <sup>c</sup> | 5.9±2.5           | 2.6±2.3           | <0.001 <sup>b</sup> |
|                                                                         | Holidays      | 4.0±3.5           | 4.1±3.2           | 0.835 <sup>b</sup> | 4.8±3.5           | 3.7±3.2           | 3.7±3.0             | 0.433 <sup>c</sup> | 4.4±2.9           | 3.8±3.7           | 0.334 <sup>b</sup>  |
| Distance between the screen and the face during esports activities (cm) |               | 45.2±29.3         | 44.3±24.6         | 0.906 <sup>b</sup> | 38.5±29.8         | 48.2±24.9         | 46.7±24.6           | 0.093 <sup>c</sup> | 26.8±14.1         | 62.1±24.6         | <0.001 <sup>b</sup> |
| Physical complaints                                                     |               |                   |                   |                    |                   |                   |                     |                    |                   |                   |                     |
| Headache                                                                | Presence      | 10(27.0)          | 14(33.3)          | 0.628 <sup>a</sup> | 7(25.9)           | 15(34.9)          | 2(22.2)             | 0.723 <sup>a</sup> | 12(30.8)          | 12(30.0)          | 1.000 <sup>a</sup>  |
| Neck pain                                                               | Presence      | 8(21.6)           | 15(35.7)          | 0.217 <sup>a</sup> | 10(37.0)          | 11(25.6)          | 2(22.2)             | 0.633 <sup>a</sup> | 16(41.0)          | 7(17.5)           | 0.027 <sup>a</sup>  |
| Stiff or sore shoulders                                                 | Presence      | 15(40.5)          | 24(57.1)          | 0.178 <sup>a</sup> | 13(48.1)          | 23(53.5)          | 3(33.3)             | 0.621 <sup>a</sup> | 23(59.0)          | 16(40.0)          | 0.117 <sup>a</sup>  |
| Wrist pain                                                              | Presence      | 2(5.4)            | 3(7.1)            | 1.000 <sup>a</sup> | 10(37.0)          | 12(27.9)          | 1(11.1)             | 0.408 <sup>a</sup> | 5(12.8)           | 0(0.0)            | 0.026 <sup>a</sup>  |
| Finger pain                                                             | Presence      | 1(2.7)            | 2(4.8)            | 1.000 <sup>a</sup> | 3(11.1)           | 2(4.7)            | 0(0.0)              | 0.692 <sup>a</sup> | 2(5.1)            | 1(2.5)            | 0.615 <sup>a</sup>  |
| Low back pain                                                           | Presence      | 14(37.8)          | 9(21.4)           | 0.139 <sup>a</sup> | 2(7.4)            | 1(2.3)            | 0(0.0)              | 0.355 <sup>a</sup> | 16(41.0)          | 7(17.5)           | 0.027 <sup>a</sup>  |
| Eye fatigue                                                             | Presence      | 15(40.5)          | 23(54.8)          | 0.261 <sup>a</sup> | 14(51.9)          | 20(46.5)          | 4(44.4)             | 0.949 <sup>a</sup> | 25(64.1)          | 13(32.5)          | 0.007 <sup>a</sup>  |

391 *Note.* <sup>a</sup> Fisher's exact test.392 <sup>b</sup> Mann–Whitney U test.393 <sup>c</sup> Kruskal–Wallis test.

394 TABLE 3. CORRELATION BETWEEN ESPORTS ACTIVITIES

|                                                                        | (1)      | (2)    | (3)      | (4)    |
|------------------------------------------------------------------------|----------|--------|----------|--------|
| (1) Device mainly used                                                 |          |        |          |        |
| (2) Duration of esports titles played primarily                        | -0.208   |        |          |        |
| (3) Hours of esports activities per day on weekdays                    | 0.266*   | 0.011  |          |        |
| (4) Hours of esports activities per day on holidays                    | 0.100    | -0.068 | 0.524**  |        |
| (5) Distance between the screen and the face during esports activities | -0.598** | 0.073  | -0.499** | -0.160 |

395 *Note.* Spearman's rank correlation coefficients.

396 \*  $p < 0.05$ , \*\*  $p < 0.001$ .

397 TABLE 4. RELATIONSHIPS BETWEEN ESPORTS ACTIVITIES AND PHYSICAL ACTIVITIES

|                      |                                                                    | Headache |           |       | Neck pain |            |       | Stiff or sore shoulders |            |       | Lower back pain |            |       | Eye fatigue |            |       |
|----------------------|--------------------------------------------------------------------|----------|-----------|-------|-----------|------------|-------|-------------------------|------------|-------|-----------------|------------|-------|-------------|------------|-------|
|                      |                                                                    | OR       | 95%CI     | p     | OR        | 95%CI      | p     | OR                      | 95%CI      | p     | OR              | 95%CI      | p     | OR          | 95%CI      | p     |
| Model 1 <sup>a</sup> |                                                                    |          |           |       |           |            |       |                         |            |       |                 |            |       |             |            |       |
|                      | Device mainly used (0 = PC or console; 1 = mobile)                 | 0.81     | 0.25-2.65 | 0.723 | 5.62      | 1.72-18.33 | 0.004 | 7.63                    | 2.16-27.03 | 0.002 | 4.71            | 1.52-14.61 | 0.007 | 4.45        | 1.37-14.41 | 0.013 |
|                      | Duration of esports titles played primarily                        | 1.07     | 0.79-1.46 | 0.648 | 1.17      | 0.85-1.60  | 0.337 | 1.03                    | 0.77-1.37  | 0.865 | 1.12            | 0.81-1.54  | 0.497 | 0.83        | 0.61-1.12  | 0.219 |
|                      | Hours of esports activities per day                                |          |           |       |           |            |       |                         |            |       |                 |            |       |             |            |       |
|                      | Weekdays                                                           | 0.98     | 0.83-1.16 | 0.813 | 1.09      | 0.91-1.29  | 0.343 | 0.98                    | 0.84-1.15  | 0.804 | 1.20            | 1.00-1.44  | 0.056 | 1.02        | 0.87-1.20  | 0.777 |
|                      | Holidays                                                           | 0.96     | 0.83-1.12 | 0.631 | 0.94      | 0.81-1.10  | 0.464 | 0.94                    | 0.82-1.08  | 0.410 | 0.93            | 0.79-1.08  | 0.339 | 0.92        | 0.80-1.06  | 0.245 |
|                      | Distance between the screen and the face during esports activities | 0.91     | 0.75-1.12 | 0.372 | 0.61      | 0.44-0.85  | 0.003 | 0.69                    | 0.54-0.87  | 0.002 | 0.75            | 0.59-0.96  | 0.024 | 0.71        | 0.56-0.89  | 0.003 |
| Model 2 <sup>b</sup> |                                                                    |          |           |       |           |            |       |                         |            |       |                 |            |       |             |            |       |
|                      | Device mainly used (0 = PC or console; 1 = mobile)                 | 0.69     | 0.17-2.80 | 0.606 | 3.47      | 0.89-13.53 | 0.073 | 7.42                    | 1.73-31.78 | 0.007 | 3.42            | 0.84-13.90 | 0.085 | 2.44        | 0.62-9.59  | 0.203 |
|                      | Duration of esports titles played primarily                        | 1.07     | 0.79-1.46 | 0.656 | 1.13      | 0.82-1.56  | 0.456 | 1.01                    | 0.75-1.36  | 0.965 | 1.10            | 0.80-1.51  | 0.577 | 0.79        | 0.58-1.08  | 0.136 |
|                      | Hours of esports activities per day                                |          |           |       |           |            |       |                         |            |       |                 |            |       |             |            |       |
|                      | Weekdays                                                           | 0.96     | 0.78-1.18 | 0.700 | 0.93      | 0.75-1.16  | 0.546 | 0.85                    | 0.69-1.04  | 0.110 | 1.11            | 0.89-1.38  | 0.349 | 0.84        | 0.68-1.04  | 0.106 |
|                      | Holidays                                                           | 0.96     | 0.83-1.12 | 0.624 | 0.92      | 0.78-1.09  | 0.348 | 0.93                    | 0.80-1.08  | 0.338 | 0.91            | 0.76-1.07  | 0.257 | 0.90        | 0.77-1.05  | 0.167 |
|                      | Distance between the screen and the face during esports activities | 0.87     | 0.66-1.13 | 0.292 | 0.63      | 0.43-0.94  | 0.024 | 0.65                    | 0.48-0.88  | 0.006 | 0.81            | 0.59-1.11  | 0.190 | 0.76        | 0.57-1.01  | 0.056 |

398 Note. <sup>a</sup> Logistic regression analysis adjusted for age.

399 <sup>b</sup> Logistic regression analysis adjusted for age and esports level.

400 OR, odds ratio, CI, confidence interval.
